# Supplementary material for: A Hotspot Phosphorylation Site on SHP2 Drives Oncoprotein Activation and DrugResistance
Source: Research Square preprint supplement (doi:10.21203/rs.3.rs-7032881/v1), 2025-08-05
Supplement: Supplementary file 1 [file 4489d900422ba27c02c8dcaa.docx]

Protocol – Gibson cloning of SHP2 mutants into pLX304

**Overview**

The protocol consists of 3 PCR steps and 1 Gibson reaction

PCR 1: Amplifies part 1 of the pLX304 backbone


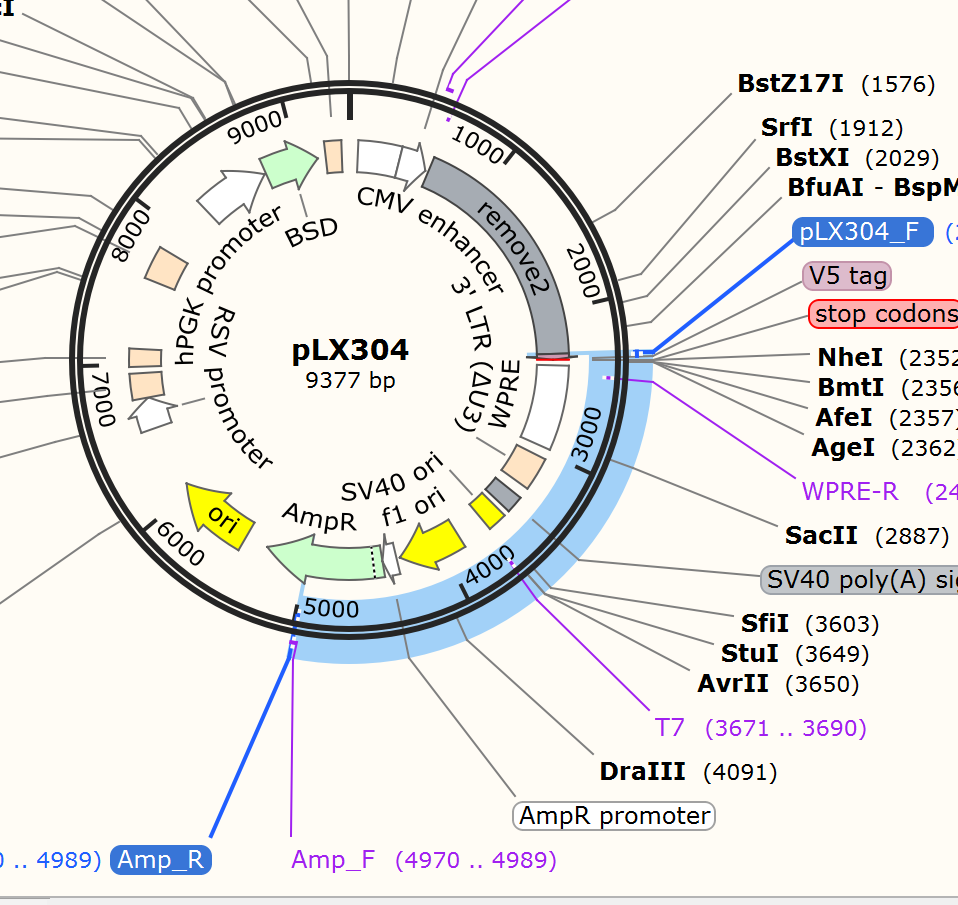


PCR 2: Amplifies part 2 of the pLX304 backbone


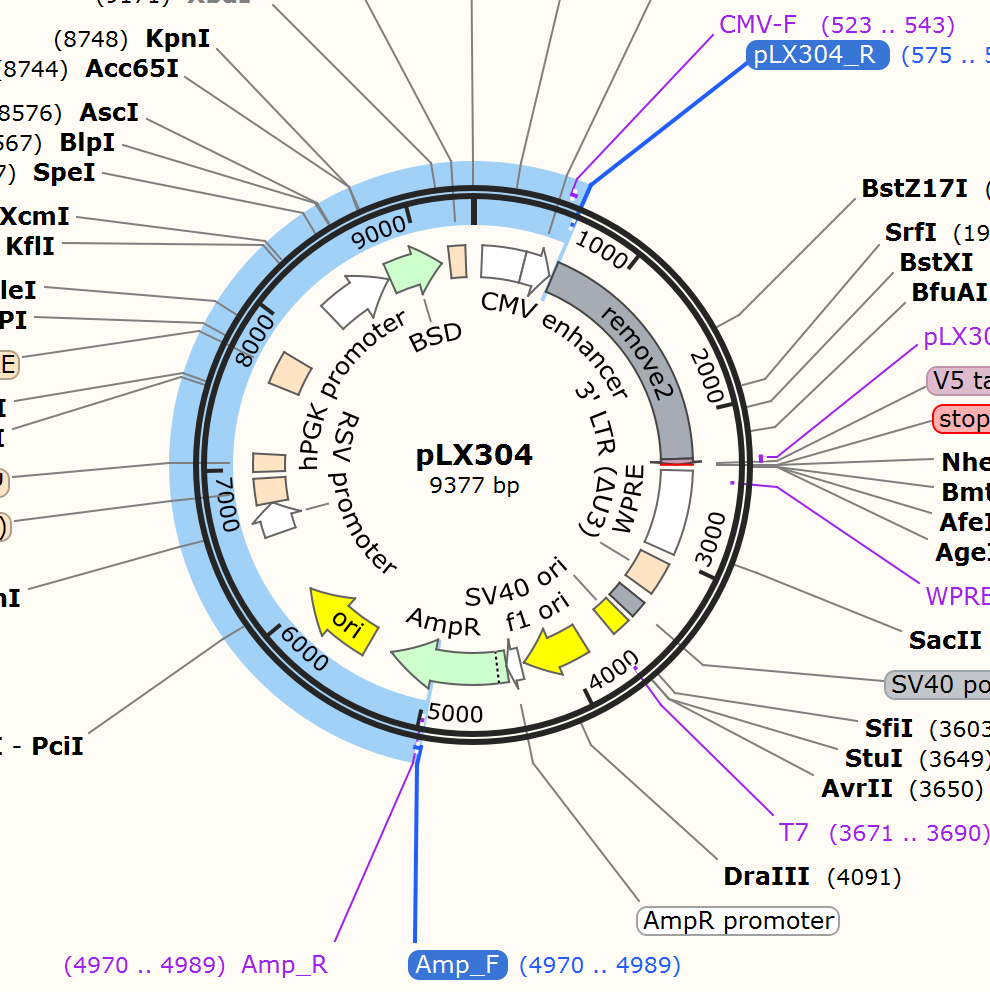


PCR 3: Amplifies the SHP2 variants of the pGEX vectors


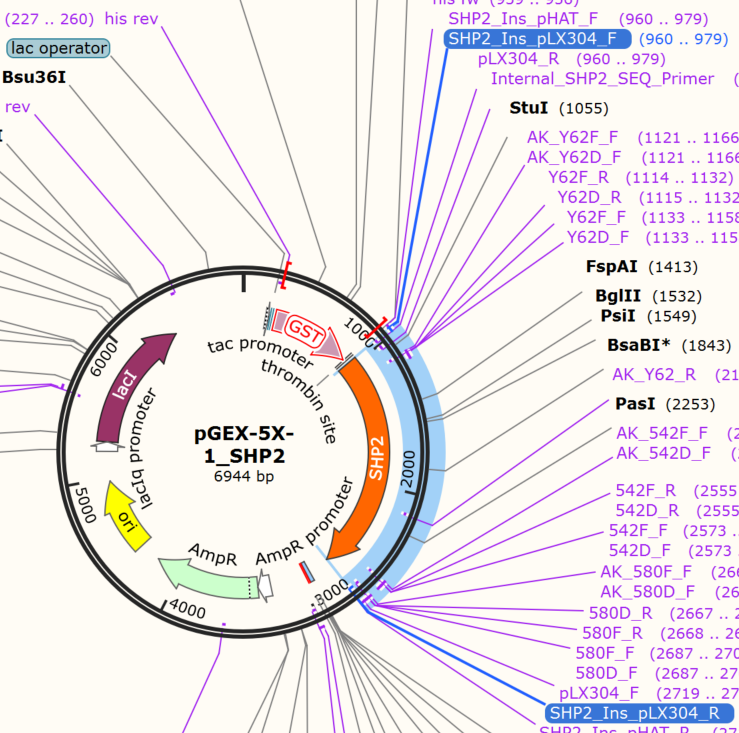


**Materials**Gibson 2x MM
Primers

- Amp_F
- Amp_R
- pLX304_F
- pLX304_R
- SHP2_Ins_pLX304_F
- SHP2_Ins_pLX304_R

Plasmids

- pLX304
- pGEX_SHP2_WT
- pGEX_SHP2_Y62F
- pGEX_SHP2_Y542F
- pGEX_SHP2_Y580F
- pGEX_SHP2_Y62F_Y542F
- pGEX_SHP2_Y62F_Y580F
- pGEX_SHP2_Y542F_Y580F
- pGEX_SHP2_Y62F_Y542F_Y580F

1% Agarose gel

DpnI

PCR clean up kit

Gibson 2x HIFI MM

*E. coli* Dh5alpha

**Methods**

PCR 1 – 200 µL – **2690 bp** – 68 degrees annealing

Prepare in a PCR tube:

97 uL Nuclease Free Water

1 uL pLX304**_F** (100 µM)

1 uL Amp**_R** (100 µM)

1 uL pLX304 S (~200 ng/µL)
100 uL Q5 2x MM

Vortex – spin down – Divide 100 µL over 2 PCR tubes

PCR: 30 cycles of step 2-4
98 30 seconds

98 10 seconds

68 15 seconds

72 **1.5** minutes

72 2 minutes

10 hold

PCR 2 – 200 uL – **5000 bp** – 68 degrees annealing

Prepare in a PCR tube:

97 µL Nuclease Free Water

1 µL pLX304**_R** (100 µM)

1 µL Amp**_F** (100 µM)

1 µL pLX304 S (~200 ng/µL)
100 µL Q5 2x MM

*Really watch that you are adding the 1 µL!

Vortex – spin down – Devide 100 µL over 2 PCR tubes

PCR: 30 cycles of step 2-4
98 30 seconds

98 10 seconds

68 15 seconds

72 **5** minutes

72 **10** minutes

10 hold

PCR 3 – 8x 100 µL – **1783 bp** – 68 degrees annealing

Prepare MM in a 1.5 mL tube:

388 µL Nuclease Free Water

4 µL SHP2_Ins_pLX304_**F** (100 µM)

4 µL SHP2_Ins_pLX304_**R** (100 µM)

400 µL Q5 2x MM

Vortex – spin down - Devide over 8 PCR tubes: 98 µL each (just to make sure you don’t have to little for the last one)

Add 0.5 µL of each pGEX SHP2 plasmid to a tube – watch closely.

pGEX_SHP2_WT = 1

pGEX_SHP2_Y62F = 2

pGEX_SHP2_Y542F = 3

pGEX_SHP2_Y580F = 4

pGEX_SHP2_Y62F_Y542F = 5

pGEX_SHP2_Y62F_Y580F = 6

pGEX_SHP2_Y542F_Y580F = 7

pGEX_SHP2_Y62F_Y542F_Y580F = 8

Vortex – spin down

PCR: 30 cycles of step 2-4
98 30 seconds

98 10 seconds

**67** 15 seconds

72 **1** minutes

72 2 minutes

10 hold

1% Agarose gel control

Take 5 µL of each unique sample (so for PCR 1 and PCR2 only 1 check, for PCR 3 all 8 samples) to a gel – check if the size is roughly correct.

5 µL PCR

5 µL H2O

2 µL 6x Loading dye

Left over 95 µL PCR can be stored at 4 degrees if not immediately continuing to DpnI treatment.

DpnI digestion

To each PCR tube, add 1 µL DpnI

Incubate at 37 degrees in the PCR machine for 30 minutes

PCR clean up

Immediately following DpnI digest – clean up the PCR/DpnI samples

Use Nucleaspin Gel and PCR clean up

*For PCR 1/2*

Add 400 µL yellow binding buffer to a 1.5 mL tubes

Combine and add 200 µL PCR reaction

*For PCR 3*

Add 200 µL yellow binding buffer to a 1.5 mL tubes (1 for each PCR tube)

Add 100 µL PCR reaction

Follow protocol. Elute with nuclease free water. Elute 20 µL for PCR 1 and 2, 15 µL for each PCR 3.

Measure concentrations – can be stored at -20.

Gibson

*Volumes depend on concentrations of DNA – lets decide when you know.

In PCR tube

1 µL Backbone PCR1

2 µL Backbone PCR2

1 µL SHP2 Insert DNA

5 µL 2x HIFI MM

Incubate for 1 hour at 50 degrees Celsius (lid at 80 degrees).

Gibson can be stored at -20 if not immediately continuing to transformation.

Transformation

Transform 2.5 µL to 50 µL dh5x cells

As per protocol (30 seconds at 42 heatshock)

Plate all cells to ampicillin plates.
